# Supplementary material for: Characterization of the furin cleavage motif for HIV-1 trimeric envelope glycoprotein by intact LC-MS analysis
Source: Royal Society of Chemistry journal article supplement (doi:10.1039/c9an02098e), 2020-01-01
Supplement: c9an02098e1.pdf [file c9an02098e1.pdf]

## Supporting Information

# Characterization of the Furin Cleavage Motif for HIV-1 Trimeric Envelope Glycoprotein by Intact LC-MS Analysis

Nicole A. Schneck, Vera B. Ivleva, Cindy X. Cai, Jonathan W. Cooper, Q. Paula Lei\*

Vaccine Production Program, Vaccine Research Center, National Institute of Allergy and Infectious Diseases, National Institutes of Health, Gaithersburg MD, 20878, USA

\*Corresponding author:

Paula Lei, Ph.D.

Email: [paula.lei@nih.gov](mailto:paula.lei@nih.gov)

9 West Watkins Mill Rd.

Gaithersburg, MD 20878, USA

Phone: 1-301-761-7288

## **Table of Contents**

|                                                                                     |          |
|-------------------------------------------------------------------------------------|----------|
| Evaluation of Env denaturation with and without the use of urea.....                | Fig. S1  |
| Theoretical mass calculation of gp120 accounting for N-glycan occupancy levels..... | Table S1 |
| Theoretical mass calculation of gp41 accounting for N-glycan occupancy levels.....  | Table S2 |

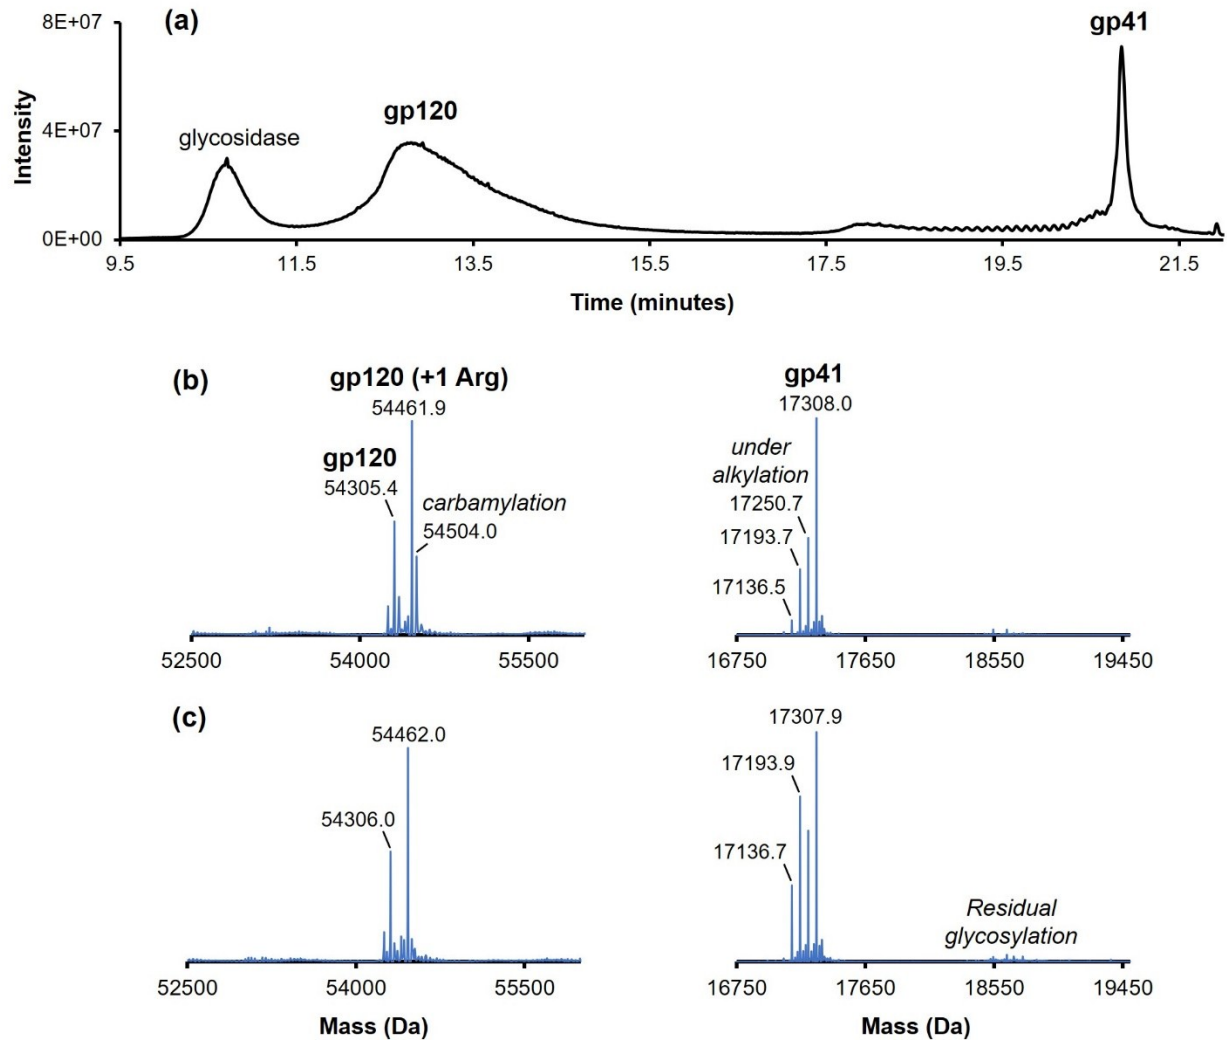

**Figure S1.** (a) Representative total ion chromatograms of gp120 and gp41 subunits and their deconvoluted MS spectra (gp120 on left and gp41 on right) after using the following sample preparation conditions: 6 M urea and 100 mM DTT at 60°C for 30 min, followed by 150 mM IAM treatment, a buffer-exchange step and overnight deglycosylation with PNGase F at 37°C. (b) with and (c) without the addition of 6 M urea (all other sample preparation conditions held constant). Theoretical masses for gp120 with the addition of 0 and 1 arginine residues were 54,305.6 and 54,461.8 Da, respectively, whereas the theoretical mass for gp41 with 0 arginine residues was 17,307.8 Da.

**Table S1.** Calculated theoretical average molecular weight (MW) for the reduced and deglycosylated gp120 subunit accounting for percent (%) N-glycan occupancy (based on previously reported LC-MS results for the same HIV Env trimer construct/material).<sup>1</sup>

| Glycan site #                                | Reported % N-glycan occupancy | Mass shift (Da)               |
|----------------------------------------------|-------------------------------|-------------------------------|
| N88                                          | 99%                           | 0.974                         |
| N133                                         | 100%                          | 0.984                         |
| N137                                         | 100%                          | 0.984                         |
| N156                                         | 100%                          | 0.984                         |
| N160                                         | 100%                          | 0.984                         |
| N182                                         | 59%                           | 0.581                         |
| N185                                         | 100%                          | 0.984                         |
| N197                                         | 79%                           | 0.777                         |
| N234                                         | 100%                          | 0.984                         |
| N262                                         | 100%                          | 0.984                         |
| N276                                         | 100%                          | 0.984                         |
| N295                                         | 100%                          | 0.984                         |
| N301                                         | 100%                          | 0.984                         |
| N332                                         | 100%                          | 0.974                         |
| N339                                         | 99%                           | 0.984                         |
| N355                                         | 100%                          | 0.984                         |
| N363                                         | 100%                          | 0.984                         |
| N386                                         | 100%                          | 0.984                         |
| N392                                         | 100%                          | 0.984                         |
| N398                                         | 100%                          | 0.984                         |
| N406                                         | ND*                           | 0.984                         |
| N411                                         | ND*                           | 0.984                         |
| N448                                         | 100%                          | 0.984                         |
| N460                                         | 100%                          | 0.984                         |
| Total expected MW shift upon deglycosylation |                               | 23.0 Da                       |
| Theoretical MW (Da)                          |                               | <b>+ 0 Arg</b> <b>+ 1 Arg</b> |
|                                              |                               | 53,084.5    53,240.7          |
| Theoretical MW (Da) after deglycosylation    |                               | 53,107.5    53,263.7          |

ND = N-glycan occupancy not determined for site; assumed 100% for MW estimation

For the fully alkylated gp120 subunit (+ 57 Da x 21 Cys), the theoretical average MW upon deglycosylation was calculated to be 54,305.6 Da (0 Arg) and 54,461.8 Da (+1 Arg).

**Table S2.** Calculated theoretical average MW for the reduced and deglycosylated gp41 subunit accounting for percent (%) N-glycan occupancy.<sup>1</sup>

| <b>Glycan site #</b>                         | <b>Reported<br/>% N-glycan occupancy</b> | <b>Mass shift (Da)</b> |                |
|----------------------------------------------|------------------------------------------|------------------------|----------------|
| N611                                         | 19%                                      | 0.187                  |                |
| N618                                         | 79%                                      | 0.777                  |                |
| N625                                         | 8%                                       | 0.0787                 |                |
| N637                                         | 100%                                     | 0.984                  |                |
| Total expected MW shift upon deglycosylation |                                          | 2.03 Da                |                |
| Theoretical MW (Da)                          |                                          | <b>+ 0 Arg</b>         | <b>+ 1 Arg</b> |
|                                              |                                          | 17,134.6               | 17,290.8       |
| Theoretical MW (Da) after deglycosylation    |                                          | 17,136.6               | 17,292.8       |

For the fully alkylated gp41 subunit (+57 Da x 3 Cys), the theoretical average MW upon deglycosylation was calculated to be 17,307.8 Da (0 Arg). No additional arginine residues were observed on the deglycosylated gp41 subunit.

The theoretical average MW for the non-reduced gp140 heterodimer was 70,194.9 Da (0 Arg) and 70,351.1 Da (+ 1 Arg). Upon deglycosylation, the mass shift was 25.0 Da; therefore, the theoretical average mass was adjusted to 70,219.9 Da (0 Arg) and 70,376.1 Da (+1 Arg).

Reference:

1. V.B. Ivleva, J.W. Cooper, F.J. Arnold, Q.P. Lei, *J. Am. Soc. Mass Spectrom.*, 2019, **30**, 1663-1678.
